# Supplementary material for: Bee Venom Melittin Protects against Cisplatin-Induced Acute Kidney Injury in Mice via the Regulation of M2 Macrophage Activation
Source: PubMed Central journal article supplement (PMC7551791; doi:10.3390/toxins12090574), 2020-09-06
Supplement: toxins-12-00574-s001.pdf [file toxins-12-00574-s001.pdf]

# Supplementary Materials: Bee Venom Melittin Protects Against Cisplatin-Induced Acute Kidney Injury in Mice via the Regulation of M2 Macrophage Activation

Hyunseong Kim, Jin Young Hong, Wan-Jin Jeon, Seung Ho Baek and In-Hyuk Ha

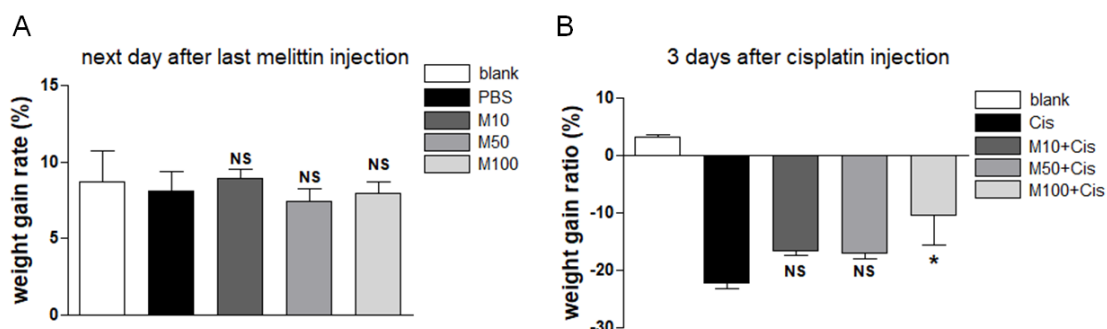

**Figure S1.** Weight gain rate of mice after melittin or cisplatin injection. (A) Percentage of the weight gain rate in the melittin groups with various concentrations compared to the control group (PBS-injected mice) without cisplatin administration after daily injection for 5 days ( $n = 8$ ). (B) Percentage of the weight gain rate (%) in the melittin groups with various concentrations compared to the control group (PBS-injected mice) at 3 days after cisplatin administration. Data are expressed as the means  $\pm$  standard error of the mean (SEM). Significant differences indicated as  $*p < 0.05$  vs the control group were analyzed via one-way analysis of variance post-hoc test. (ANOVA) with Tukey's.

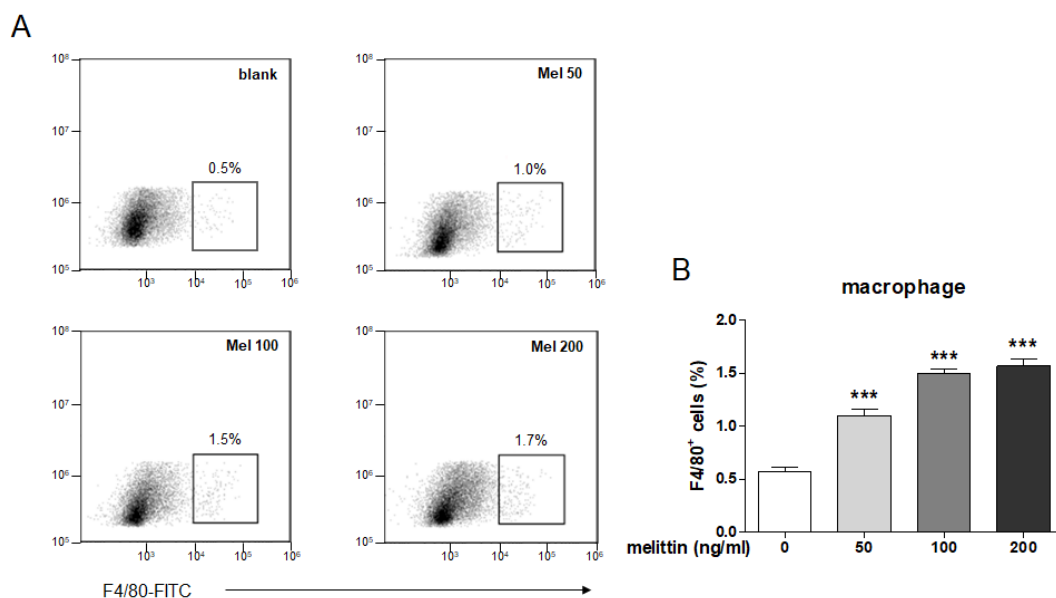

**Figure S2.** Effects of melittin on macrophage populations in mouse splenocytes. (A) Representative flow cytometry gating shows macrophages (F4/80) population in mouse splenocytes at 2 days after treatment of melittin with various concentration (50, 100, or 200 ng/ml). Quantification of the percentage of cells positive for (B) F4/80 macrophages relative to that in the blank group ( $n = 6$ ). Significant differences indicated at  $***p < 0.001$  vs the blank group were analyzed via one-way ANOVA with Tukey's post-hoc test.

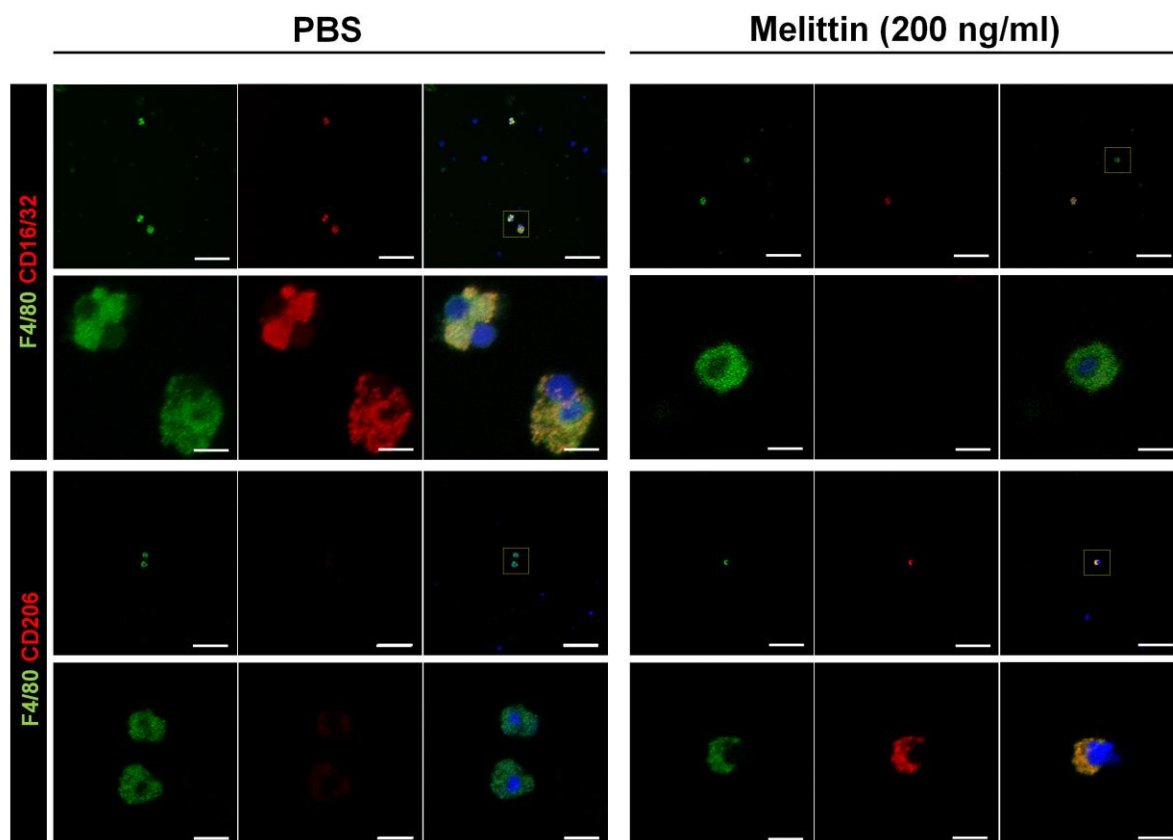

**Figure S3.** Representative images of CD16/32 (M1 macrophage) or CD206 (M2 macrophage) double stained with F4/80 macrophages marker within the splenocytes in control and melittin group treated with 200 ng/ml.

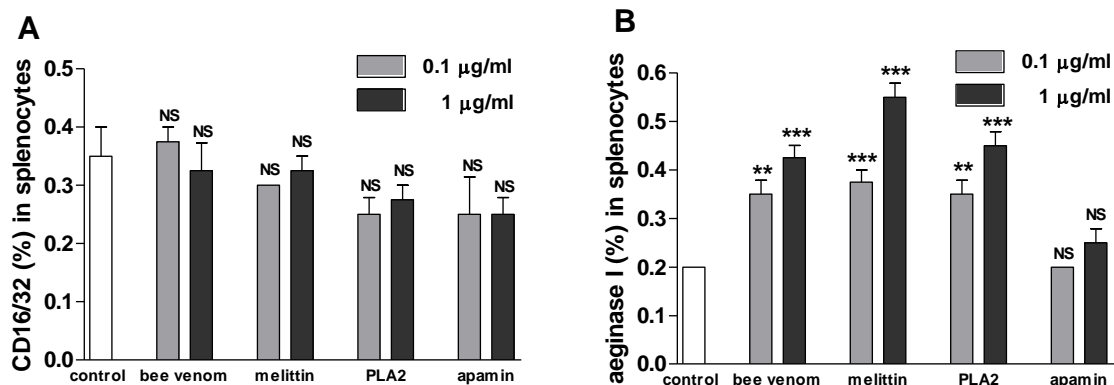

**Figure S4.** M1/M2 population change by bee venom and its constituents. Quantification of the percentage of cells positive for (A) CD16/32 (M1 macrophage marker) and (B) Arg1 (M2 macrophage marker) in splenocytes treated with the major constituents of bee venom (melittin, PLA2, apamin) relative to that in the blank group using flow cytometry ( $n = 6$ ). Significant differences indicated at  $**p < 0.01$ , and  $***p < 0.001$  vs the blank group were analyzed via one-way ANOVA with Tukey's post-hoc test.

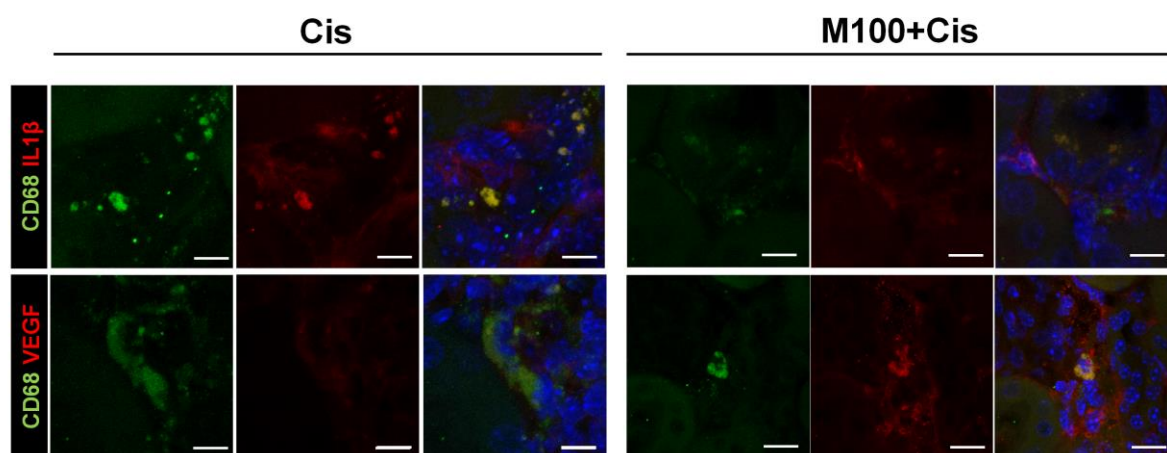

**Figure S5.** Representative images of IL-1 $\beta$  (M1 macrophage) or VEGF (M2 macrophage) double stained with CD68 macrophages marker within the renal tissue in cisplatin and melittin preinjected group with 100  $\mu\text{g}/\text{kg}$  in presence of cisplatin. Scale bar = 50  $\mu\text{m}$ .
